# Supplementary material for: Prostaglandin EP2 receptor downstream of Notch signaling inhibits differentiation of human skeletal muscle progenitors in differentiation conditions
Source: PubMed Central journal article supplement (PMC7171165; doi:10.1038/s42003-020-0904-6), 2020-04-20
Supplement: 42003_2020_904_MOESM1_ESM.pdf [file 42003_2020_904_MOESM1_ESM.pdf]

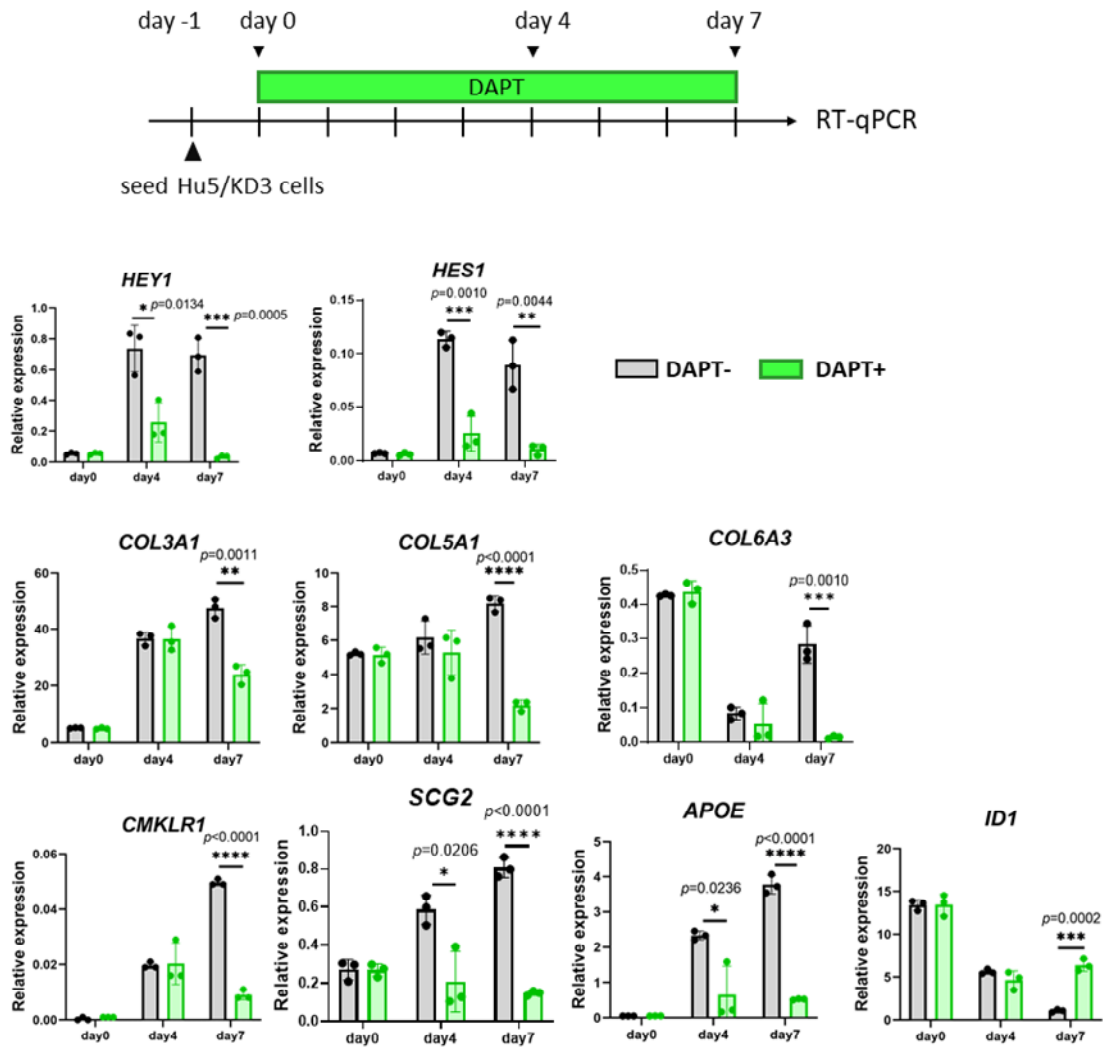

### Supplementary Fig. 2 (related to Fig. 3)

#### Gene expression in DAPT-treated and non-treated Hu5/KD3 human muscle progenitors.

- a. Experimental design and qPCR analysis of *HEY1*, *HES1*, *HEYL*, *COL3A1*, *COL5A1*, *COL6A3*, *SCG2*, *APOE*, *CMKLR1*, and *ID1* in Hu5/KD3 muscle progenitors with or without DAPT treatment. Cells were seeded at  $5 \times 10^4$ /well of 24-well plates and treated with DAPT for 7 days. Total RNA was extracted from the cells at day 0, day 4 and day 7. Data are shown as mean  $\pm$  S.D. (n=3 samples/group). DAPT-treated groups were compared with controls by unpaired two-tailed Student's *t*-test.

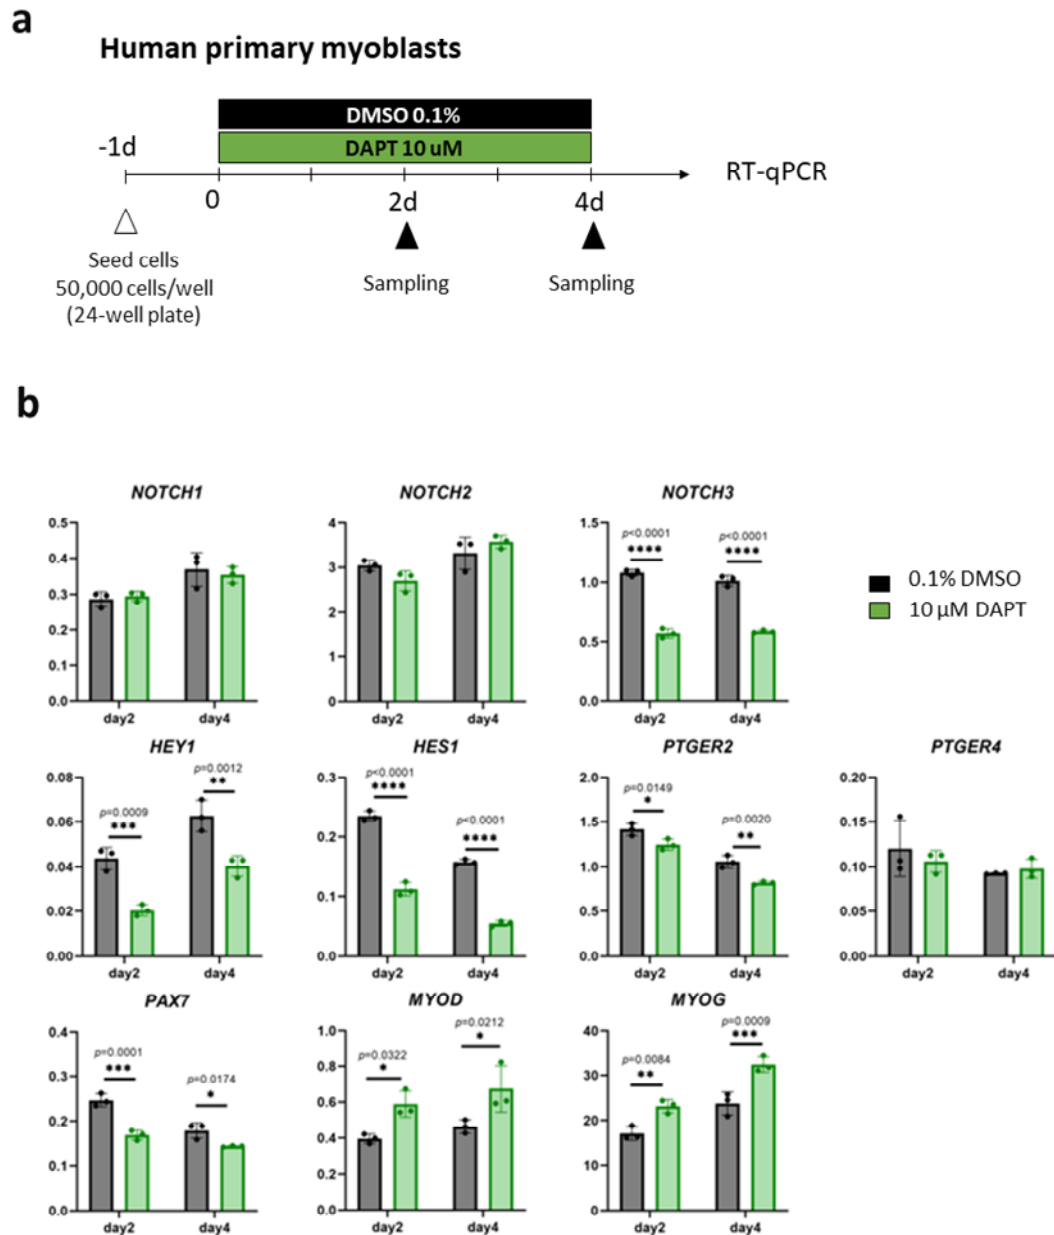

**Supplementary Fig. 3 (related to Fig. 3)**

**Analysis of gene expression in DAPT-treated and non-treated human primary myoblasts.**

**a**, Experimental design. **b**, RT-qPCR analysis of NOTCH1, NOTCH2, NOTCH3, HEY1, HES1, PTGER2, PTGER4, PAX7, MYOD, and MYOG in human primary myoblasts with or without DAPT treatment. Cells were seeded at  $5 \times 10^4$ /well of 24-well plates and treated with DAPT for 4 days. Total RNA was extracted from the cells at days 2 and 4. Data are shown as means  $\pm$  S.D. (n=3 samples/group). DAPT-treated groups were compared with controls by unpaired two-tailed Student's t-test.

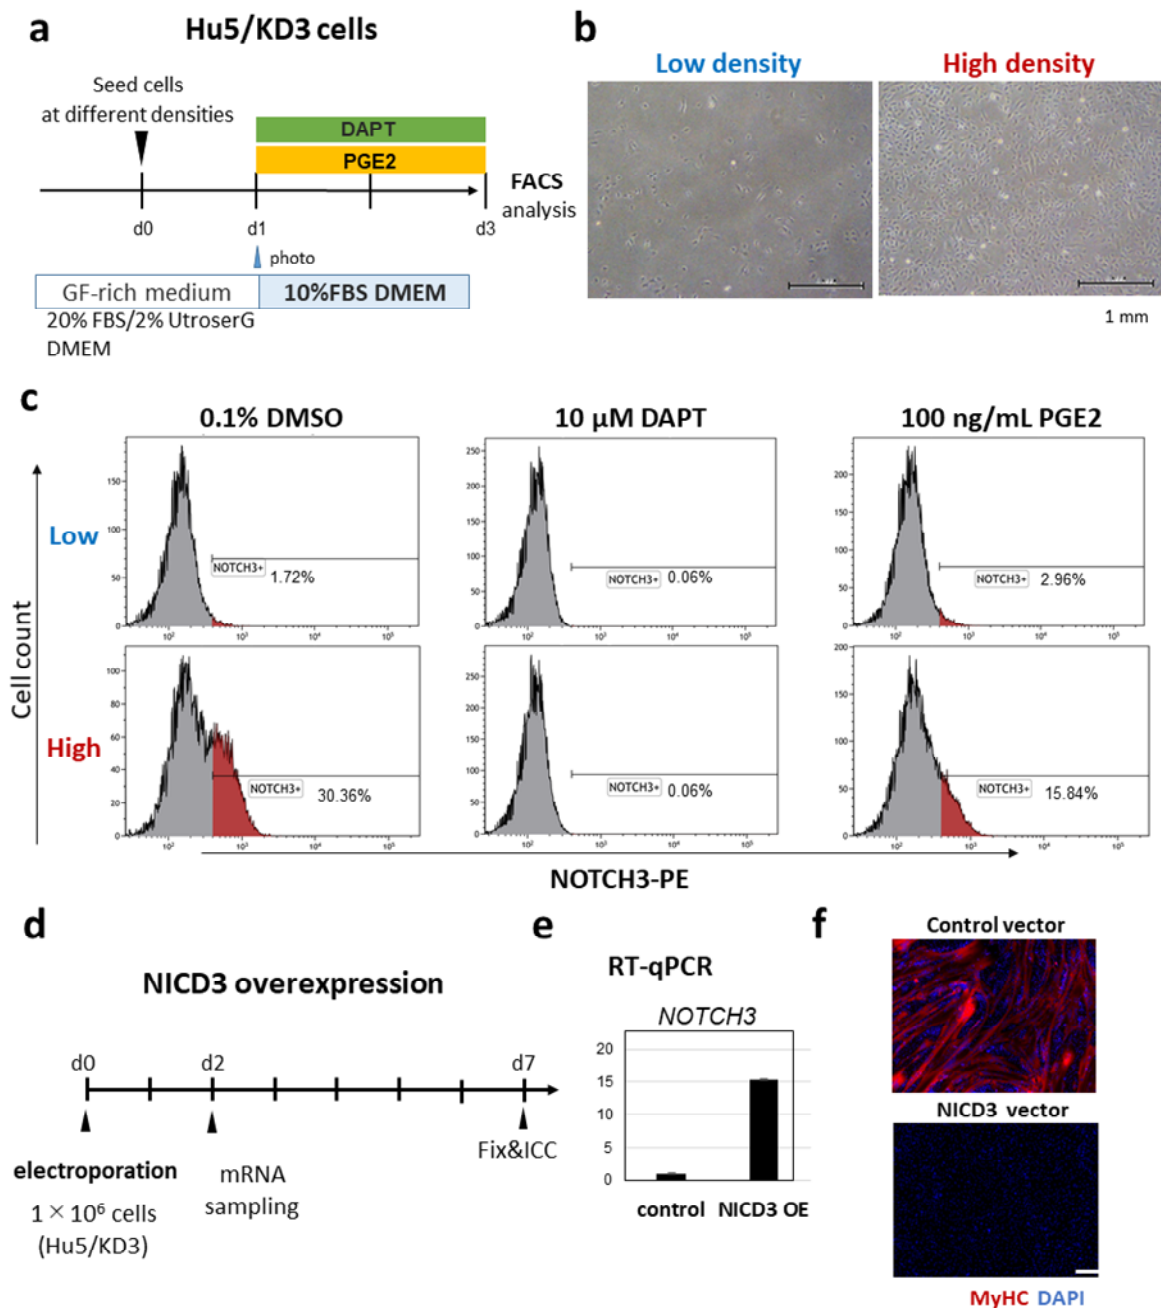

**Supplementary Fig. 4 (related to Fig. 4)**

**NOTCH3 expression is induced in human muscle progenitors in high cell density culture**

**a.** Experimental design. Hu5/KD3 cells were plated onto collagen I-dishes at two different cell densities: 5000 cells/cm<sup>2</sup> (low density) and 25000 cells/cm<sup>2</sup> (high density) (d0). Cells were cultured in the presence of DAPT (10 μM) or PGE2 (100 ng/ml) for 2 days (d1-d3).

**b.** Phase contrast of Hu5/KD3 cells 24 h after plating at different cell densities. Bar: 1

mm.

- c.** FACS for NOTCH3 expression on Hu5/KD3 plated at different cell densities. When plated at high cell density, a fraction of Hu5/kd3 cells started to express NOTCH3. DAPT treatment abolished NOTCH3 induction. PGE2 down-regulated NOTCH3 expression.
- d.** Experimental design of NICD3 overexpression. Ten  $\mu\text{g}$  of plasmids were introduced into Hu5/KD3 cells ( $1 \times 10^6$ ) using electroporation.
- e.** RT-qPCR for *NOTCH3* (n=1). At day2, cells were harvested and RNA was extracted.
- f.** Representative immunostaining of Hu5/KD3-myotubes transfected with control vector (control) or NICD3 expression vector. NICD3 overexpression completely inhibited myotube formation by Hu5/KD3 cells. Scale bar, 200  $\mu\text{m}$ .

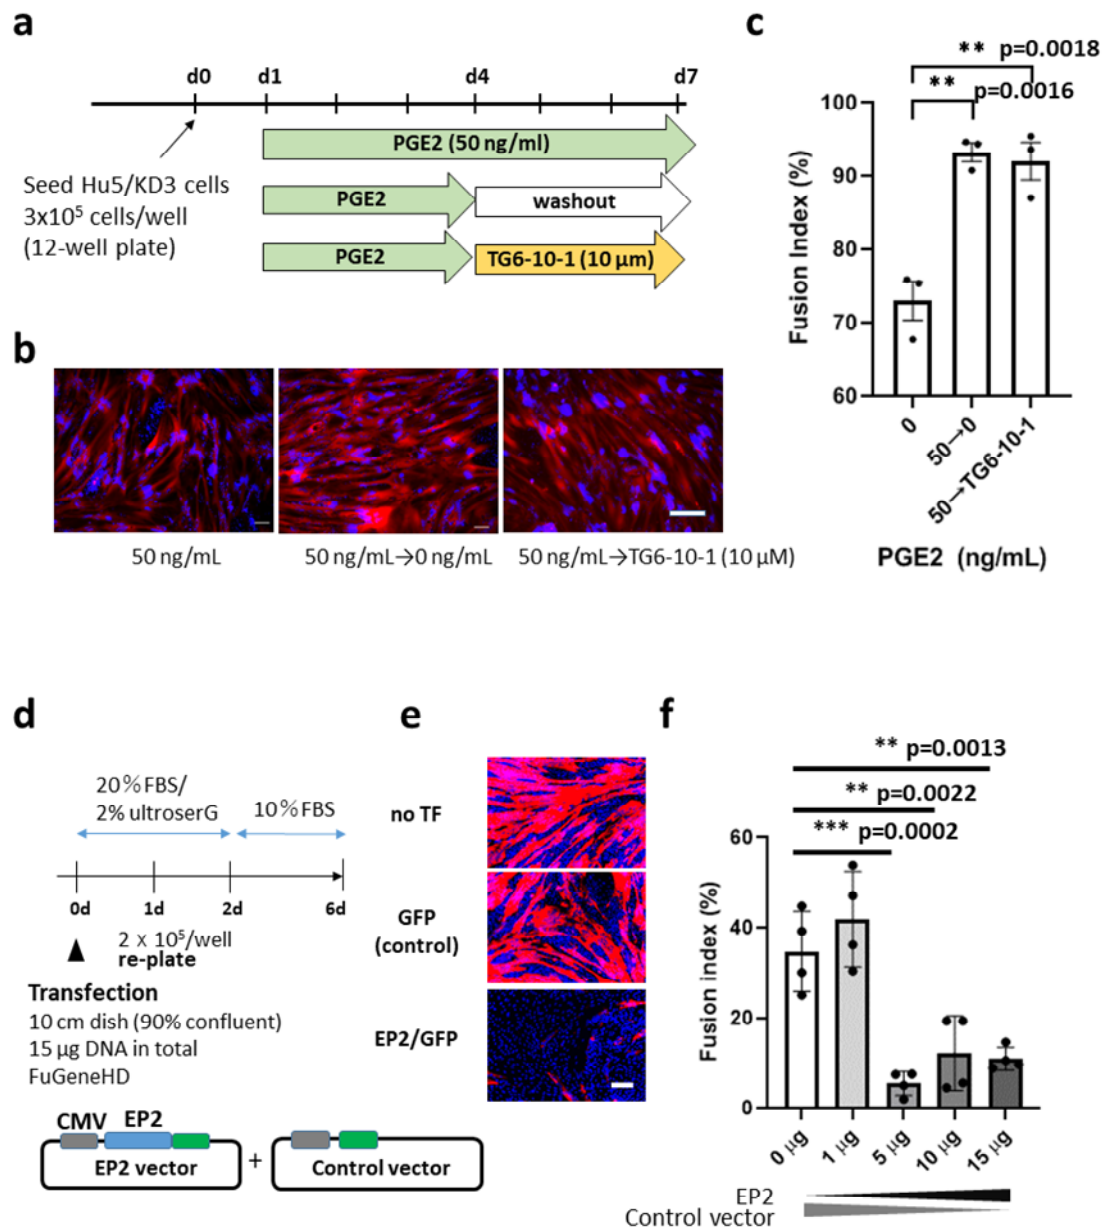

**Supplementary Fig. 5 (related to Fig. 5&6)**

**Reversibility of effects of prostaglandin E2 (PGE2) on myotube formation of a human myoblast cell line, Hu5/KD3 cells**

- a. Experimental design. Hu5/KD3 cells were seeded onto collagen type I-coated 12-well plates ( $3 \times 10^5$  cells/well) and divided into three groups. All groups were cultured in 10% FBS/DMEM medium with PGE2 (50 ng/ml) for 3 days. The first group was cultured continuously with PGE2 (50 ng/ml) until day 7. In the second group, PGE2 was removed at day 4. In the third group, PGE2 was changed to TG6-10-1 (10  $\mu$ M) at

- day 4. All groups were fixed at day 7. n=3/group.
- b.** Representative myosin staining of differentiating Hu5/KD3 cells in the three groups.
  - c.** Fusion index of Hu5/KD3 cells after treatment. Data are shown as mean  $\pm$  S.D. (n=3 samples). Comparison with controls was performed by one-way ANOVA followed by Dunnett's multiple comparisons test.
  - d.** Experimental design. Hu5/KD3 cells (90% confluent in 100 mm collagen-coated dishes) were transfected with CMV-GFP and CMV-EP2-GFP (15  $\mu$ g in total) and cultured in differentiation medium.
  - e.** Representative myotube formation by Hu5/KD3 cells without transfection, Hu5/KD3 cells transfected with CMV-GFP (CMV-GFP: 15  $\mu$ g), or Hu5/KD3 cells transfected with CMV-EP2-GFP (15  $\mu$ g).
  - f.** Fusion index. The doses of CMV-EP2-GFP are shown below the graph. n=4 samples/group. Comparison with controls (EP2 vector: 0  $\mu$ g) was performed by one-way ANOVA followed by Dunnett's multiple comparisons test. In **b** and **e**, cells fixed with 4% PFA were stained with MF20 (muscle myosin heavy chain, red) and DAPI (nuclei, blue). Scale bar, 100  $\mu$ m.

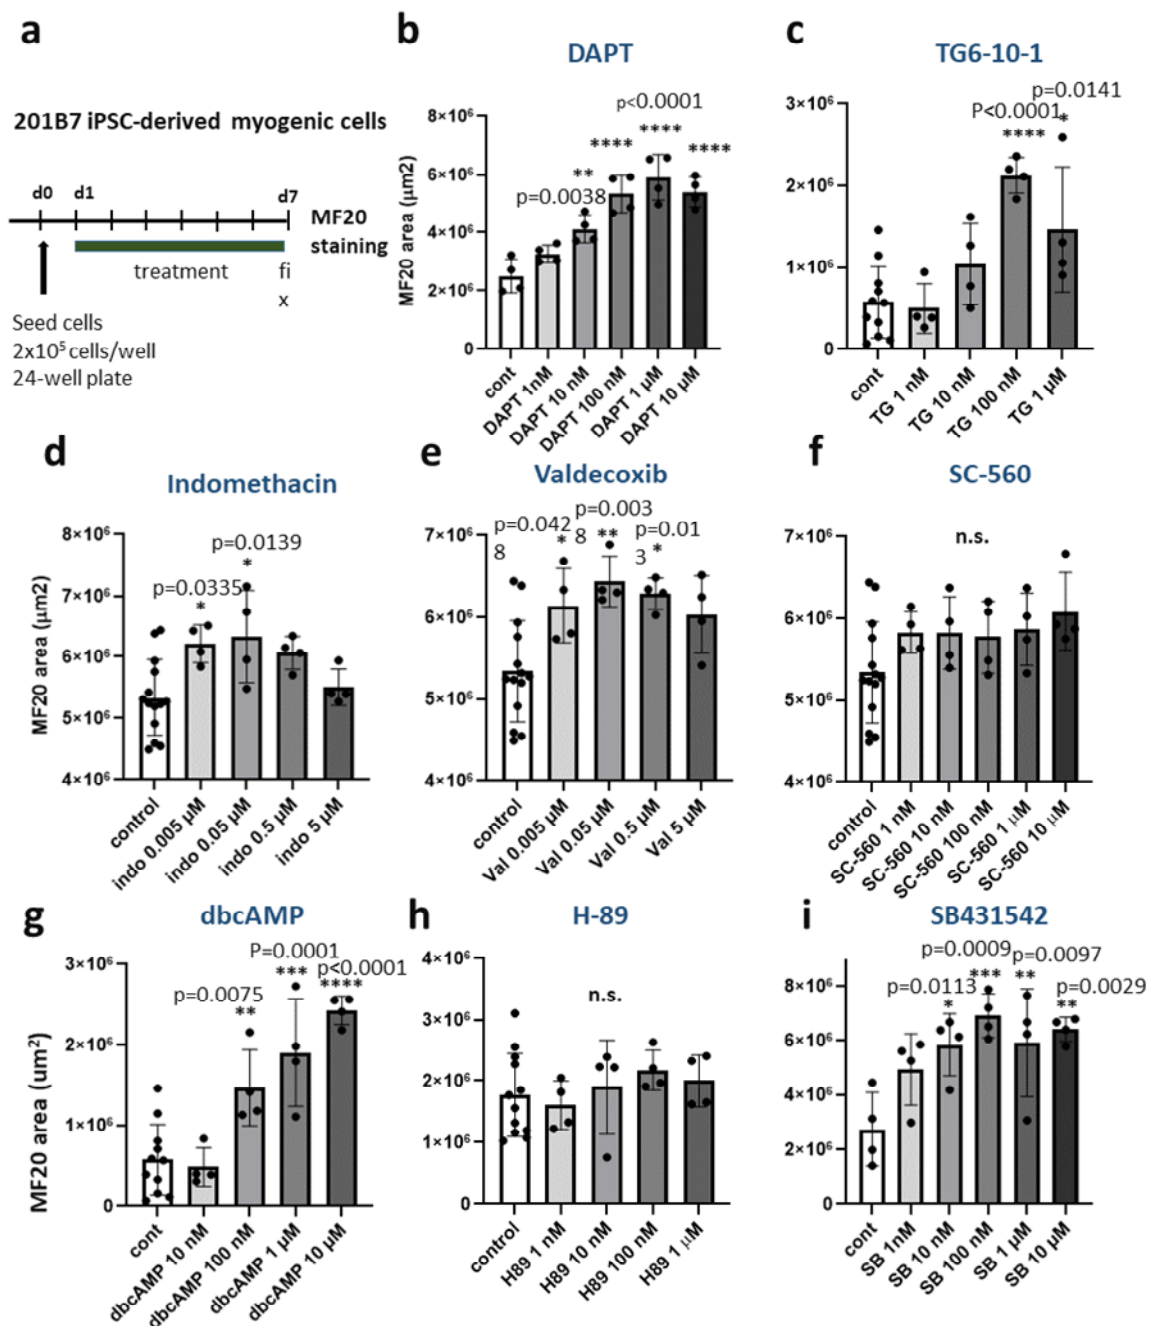

Supplementary Figure 6 (related to Fig. 8)

Effects of inhibition or activation of signaling molecules upstream and downstream of EP2 on differentiation of hiPSC-derived muscle progenitors.

a. Experimental design.

b-i, 201B7 hiPSC-derived muscle progenitors seeded at 2x10<sup>5</sup> cells/well of collagen-coated 24-well plates were treated with DAPT(b), TG6-10-1(c), Indomethacin(d), Valdecoxib (e), SC-560 (f), dbcAMP (g), H-89(h), or SB431542 (i) at indicated concentrations. n ≥ 4



samples/ group. Four views were recorded per sample. MF20-positive area was measured. One-way ANOVA followed by Dunnett's multiple comparisons test (versus control). ns, not significant.

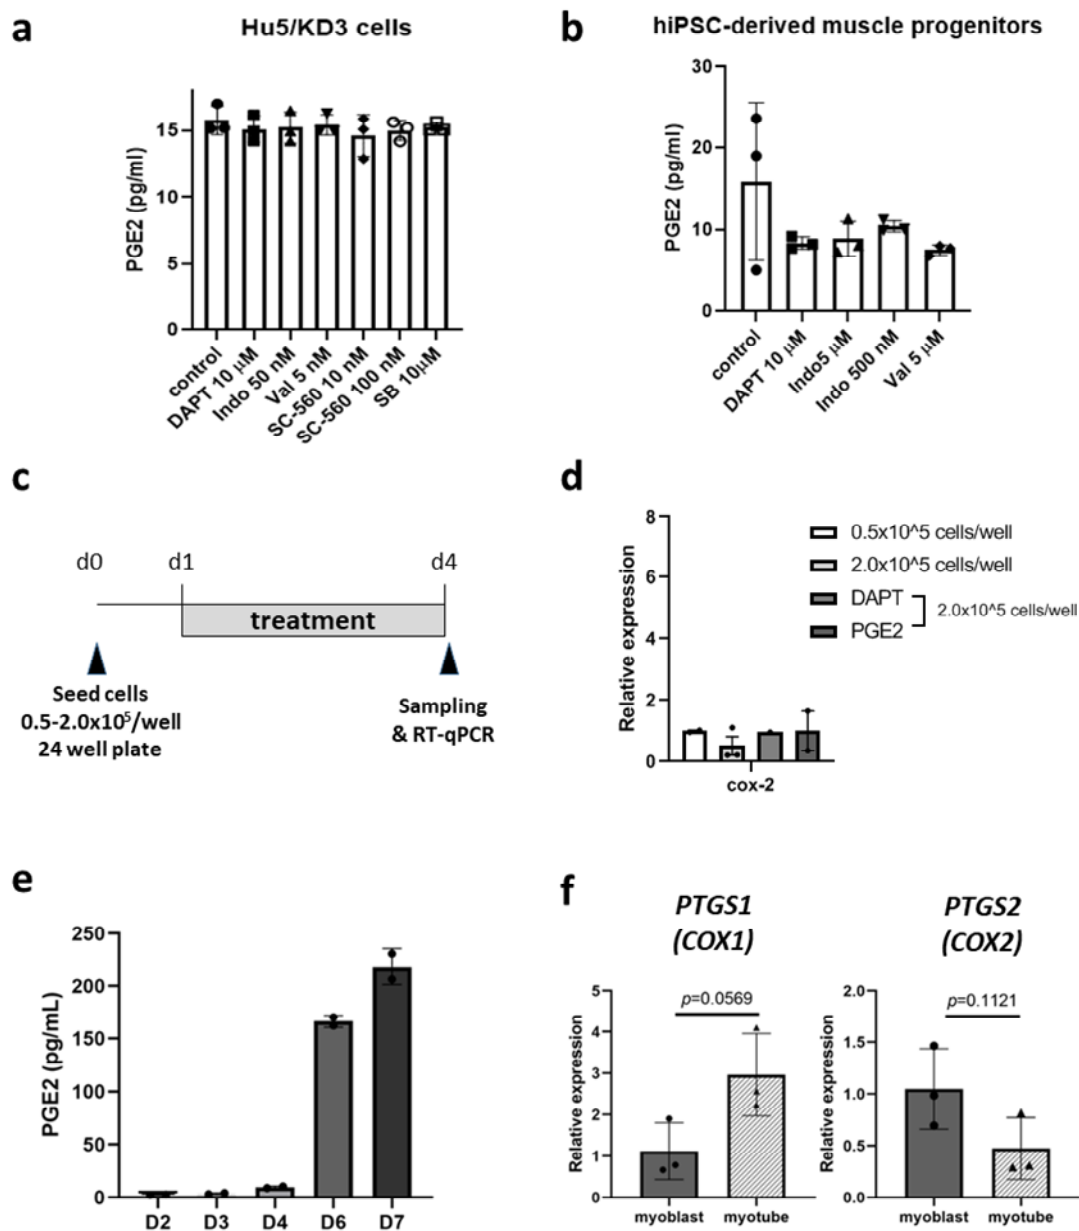

**Supplementary Fig. 7**

**Concentration of PGE2 (culture medium) and COX2 mRNA levels in DAPT- or COX-inhibitor-treated cells.**

**a., b.** PEG2 concentration in the culture medium of Hu5/KD3 (a) or hiPSC-derived muscle progenitors (b) cultured in the presence of DAPT (10  $\mu$ M), indomethacin (500 nM, 5  $\mu$ M), valdecoxib (5  $\mu$ M), SC-760 (10 nM, 100 nM) or SB431542 (10  $\mu$ M) for 48 h (a) or 24 h (b). The concentration was measured using a PGE2 Elisa kit (Cayman). n=3 samples/group.

One-way ANOVA with Dunnett's multiple comparisons test.

**c., d.** RT-qPCR for *COX2* (*PTGS2*) mRNA in proliferating (plated at  $0.5 \times 10^5$  cells/well, 6-well plate) and differentiating ( $2.0 \times 10^5$  cells/well) Hu5/KD3 cells treated with DAPT (10  $\mu$ M) or PGE2 (50 ng/ml).

**e.** PGE2 levels during muscle differentiation. At day 4 (D4) myotubes started to form and at day 6 (D6) or day 7 (D7), robust formation of multinucleated myotubes were observed. PGE2 levels increased with differentiation. n=2 samples/group.

**f.** *COX1* (*PTGS1*) and *COX2* mRNA levels in myoblasts and myotubes. Although there is statistically no significant difference, *COX2* expression was higher in myoblasts than in myotubes. In contrast, *COX1* expression was higher in myotubes than in myoblasts. n=3 samples/group. Unpaired two-tailed Student's t-test.

**a**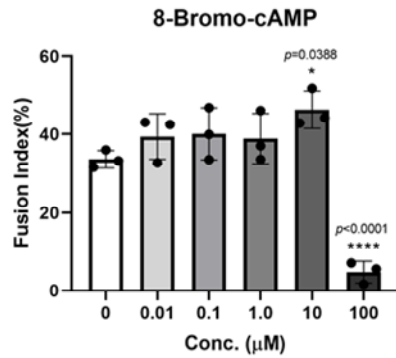**b**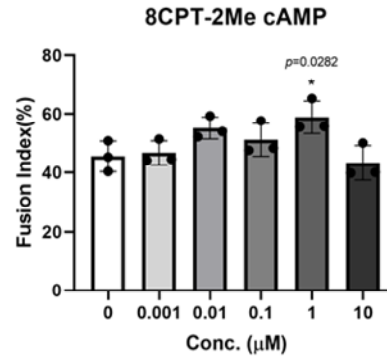**Supplementary Fig. 8 (related to Figure 8)****Effects of cAMP derivatives on differentiation of Hu5/KD3 cells**

Effects of 8-bromo-cAMP (selective activator of protein kinase A) on differentiation of Hu5/KD3 cells. High concentration of 8-bromo-cAMP (100  $\mu\text{M}$ ) showed toxic effects on the cells. n=3 samples/group.

- a. Effects of 8-CPT-2Me-cAMP (selective Epac activator) on differentiation of Hu5/KD3 cells. n=3 samples/group. In **a** and **b**, one-way ANOVA with Dunnett's multiple comparisons test was performed (versus control).

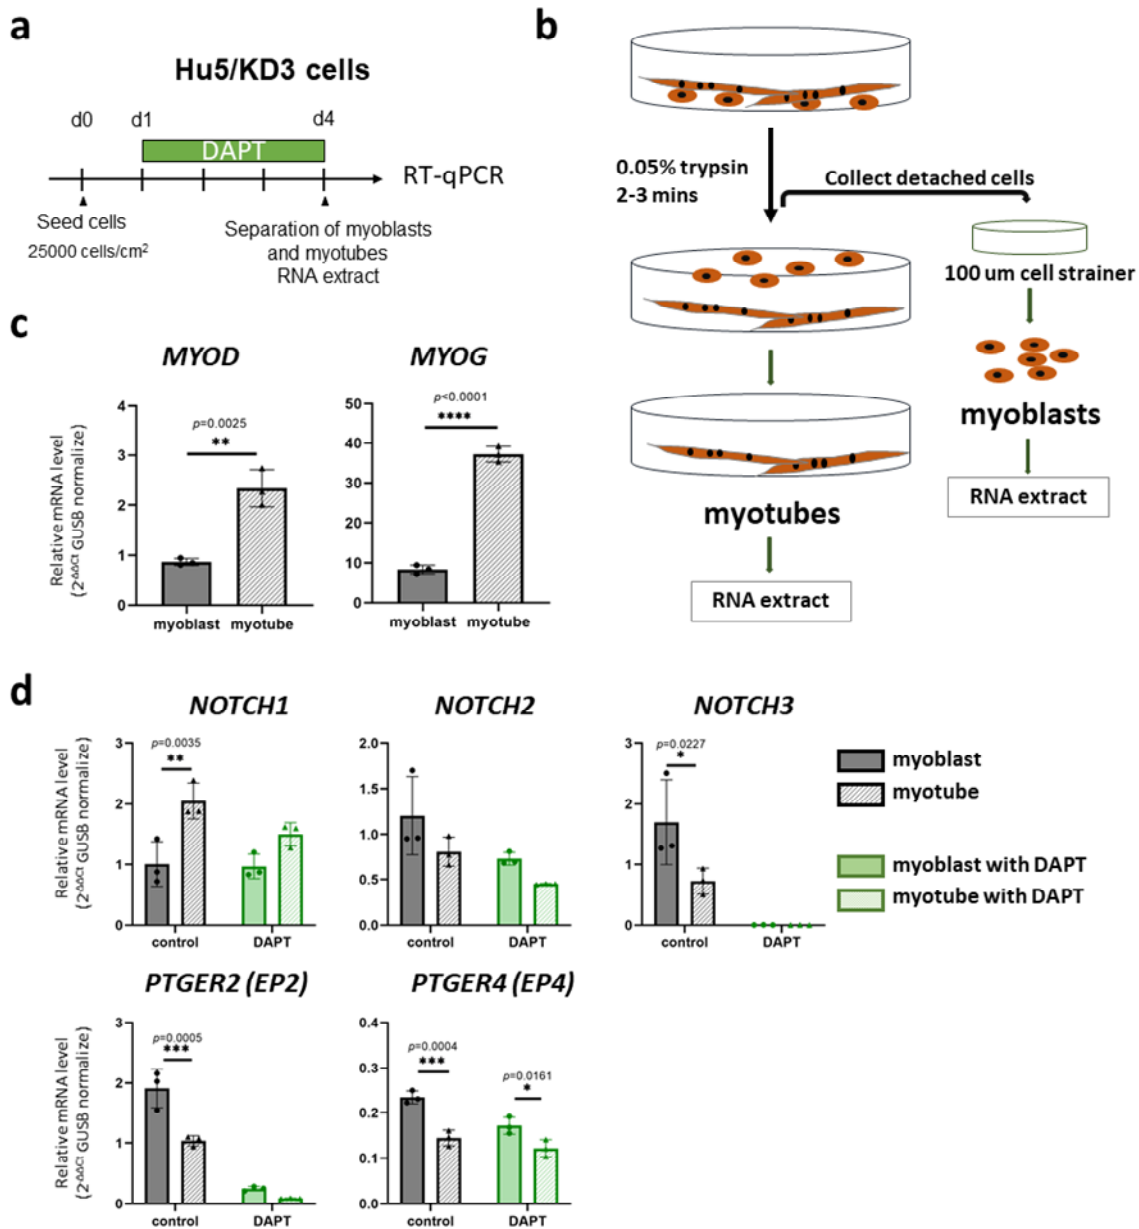

### Supplementary Fig. 9

**Expression levels of *NOTCH2*, *NOTCH3*, *PTGER2* and *PTGER4* are higher in myoblasts than in myotubes**

**a.** Experimental design. Hu5/KD3 cells (p31) were cultured for 3 d. Then formed multinuclear myotubes were separated from mononuclear cells as shown in **b** for RT-qPCR analysis.

**b.** Differentiating myogenic cells were treated with 0.05% trypsin for 2 mins at RT. Detached mononuclear cells were collected and passed through 100- $\mu$ m cell strainers

(myoblasts). Myotubes that remained attached to dishes were collected using a cell scraper (myotubes).

**c.** Relative levels of *MYOD* and *MYOGENIN* mRNA in “myoblasts” and “myotubes”.

**d.** Relative levels of *NOTCH1*, *NOTCH2*, *NOTCH3*, *PTGER2 (EP2)*, and *PTGER4(EP4)* mRNA in myoblasts and myotubes with or without DAPT treatment. In **c** and **d**, 3 samples were examined per group. Unpaired two-tailed Student's t-test.

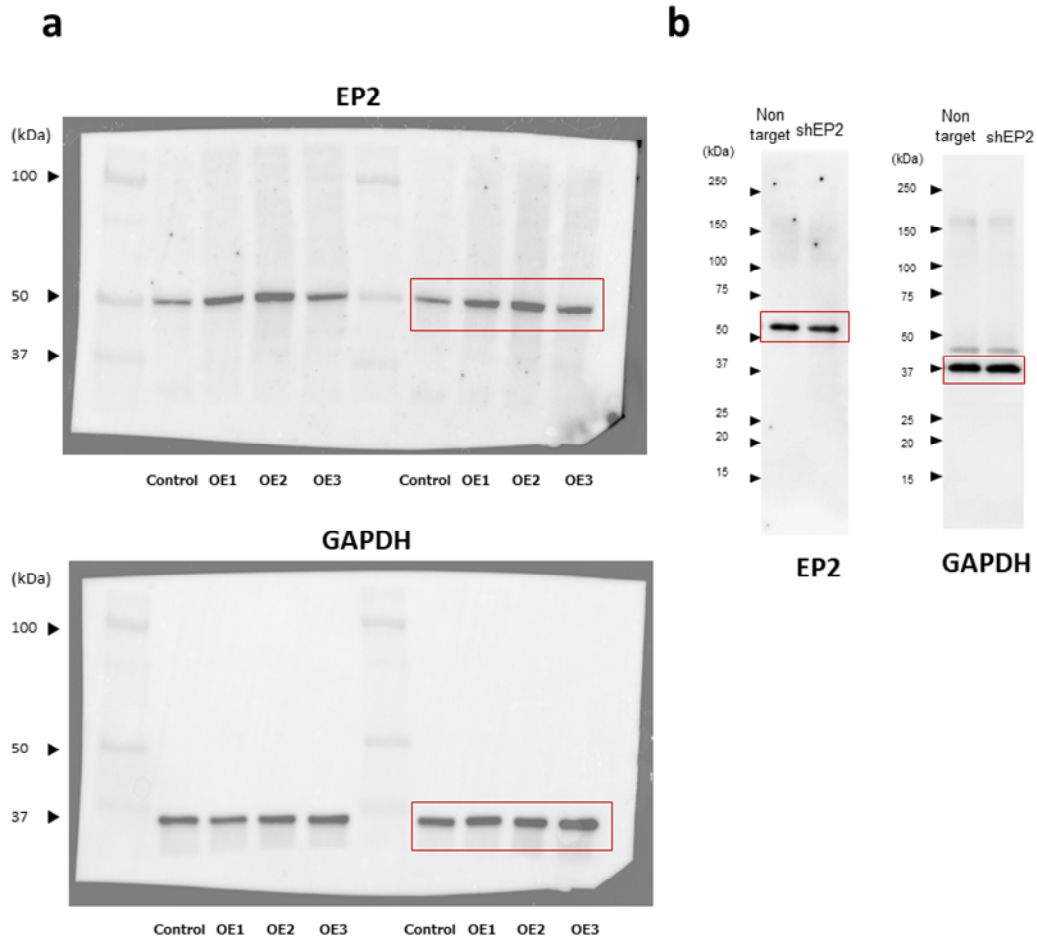

**Supplementary Fig. 10**

**Whole images of Western blots in Figure 6**

- a. EP2 overexpression experiments.
- b. EP2 knockdown by shRNA vectors. EP2 and GAPDH (loading control) were detected as a single band of approximately 50 kDa and 37 kDa, respectively.

### Supplementary Table 1

#### Primers for RT-qPCR

| GENE name           | Forward (5'-3')                                              | Reverse (5'-3')          | bp  |
|---------------------|--------------------------------------------------------------|--------------------------|-----|
| <i>NOTCH1</i>       | GGTGAAGCTGCTCTGAGGAGATC                                      | GGATTGCAGTCGTCCACGTTGA   | 150 |
| <i>NOTCH2</i>       | GGGACCTGTCCATACCCTCT                                         | GAGCCATGCTTACGCTTTTCG    | 155 |
| <i>NOTCH3</i>       | CAACCTGGCAGGGAGTTTCA                                         | TCAGGCACTCATCCACATCG     | 197 |
| <i>HEY1</i>         | GAAGCGCCGACGAGACCGAATCAA                                     | CAGGGCGTGCAGTCAAATAACC   | 193 |
| <i>HES1</i>         | GGAAATGACAGTGAAGCACCTCC                                      | GAAGCGGGTCACTCGTTCATG    | 130 |
| <i>HEYL</i>         | GAGAGTGGCGACGAGAATGG                                         | GATCCTTGCTCCATTACCTGC    | 197 |
| <i>PTGER2</i>       | GACCACCTCATTCTCTGGCTA                                        | AACCTAAGAGCTTGAGGTCCC    | 128 |
| <i>PTGER4</i>       | CCGCTCGTGGTGCAGTATT                                          | GAGATGAAGGAGCGAGAGTGG    | 287 |
| <i>COL3A1</i>       | CTTCTCTCCAGCCGAGCTTC                                         | TGTGTTTCGTGCAACCATCC     | 187 |
| <i>COL5A1</i>       | TTCAAGCGTGGGAAAAGTCT                                         | GCCTTTCTTGGTAGCACAGC     | 265 |
| <i>COL6A3</i>       | TATCCACCTCCAGCAGTTGAG                                        | CTCTCACTTTACTGGGGCCG     | 151 |
| <i>APOE</i>         | GGACAGGGGGAGCCCTATAA                                         | GTGATTGGCCAGTCGGCTC      | 105 |
| <i>CMKLR1</i>       | AGGGACTGATTGGCTGAGGA                                         | ATCCTCATTCTCATTACCGT     | 70  |
| <i>UNC5B</i>        | TGTGCATGCAAATGCTGGAG                                         | TGTCTGTGTCGAAGTCACGG     | 141 |
| <i>SCG2</i>         | AGGGATGGAGAGTGCAGCAAATCA                                     | AGCTTTGGGAAGCTGGTTCGATCT | 124 |
| <i>ID1</i>          | ATTACGTGCTCTGTGGGTCTCC                                       | TAGTAGGTGTGCAGAGAGGAGC   | 153 |
| <i>GAPDH</i>        | GCACCGTCAAGGCTGAGAAC                                         | TGGTGAAGACGCCAGTGGA      | 138 |
| <i>GUSB</i>         | AACGATTGCAGGTTTCAC                                           | CTCTCGTCGGTGACTGTTCA     | 171 |
| <i>MYOD</i>         | GGGGCTAGGTTCACTTTCT                                          | GCTCTGGCAAAGCAACTCTT     | 233 |
| <i>MYOGENIN</i>     | QIAGEN primers cat#: QT00001722* Sequences are not disclosed |                          |     |
| <i>PAX7</i>         | GGCGACTCCGGATGTAGAGA                                         | AGCACGCGGCTAATCGAAC      | 153 |
| <i>PTGS1 (COX1)</i> | GAGTACTGGAAGCCGAGCAC                                         | AGGGACAGGTCTTGGTGTG      | 103 |
| <i>PTGS2 (COX2)</i> | GCAGTTGTTCCAGACAAGCA                                         | GAAAGGTGTCAGGCAGAAGG     | 209 |
