# Supplementary material for: Prostaglandin EP2 receptor downstream of Notch signaling inhibits differentiation of human skeletal muscle progenitors in differentiation conditions
Source: PubMed Central journal article supplement (PMC7171165; doi:10.1038/s42003-020-0904-6), 2020-04-20
Supplement: 42003_2020_904_MOESM3_ESM.pdf [file 42003_2020_904_MOESM3_ESM.pdf]

## **Descriptions of Additional Supplementary Files**

Raw values of the experimental data presented in the article are shown in Supplementary Data (50 sheets) with statistical parameters.

Data for Figure 1d  
Data for Figure 1e  
Data for Figure 1h  
Data for Figure 1i  
Data for Figure 2a-c  
Data for Figure 2d-f  
Data for Table 1  
Data for Figure 3c  
Data for Figure 4c (Fusion index)  
Data for Figure 4c (Myogenin-positive cells)  
Data for Figure 4c (cell number)  
Data for Figure 4d  
Data for Figure 5c  
Data for Figure 5e  
Data for Figure 5f  
Data for Figure 5g  
Data for Figure 6a-d  
Data for Figure 6e-h  
Data for Figure 7c  
Data for Figure 7d  
Data for Figure 8b  
Data for Figure 8c  
Data for Figure 8d  
Data for Figure 8e  
Data for Figure 8f  
Data for Figure 8g  
Data for Figure 8h  
Data for Figure 8j  
Data for Figure 8l  
Data for Supplementary Figure 1c  
Data for Supplementary Figure 1d  
Data for Supplementary Figure 2  
Data for Supplementary Figure 3  
Data for Supplementary Figure 5a-c  
Data for Supplementary Figure 5d-f  
Data for Supplementary Figure 6b  
Data for Supplementary Figure 6c  
Data for Supplementary Figure 6d  
Data for Supplementary Figure 6e  
Data for Supplementary Figure 6f  
Data for Supplementary Figure 6g  
Data for Supplementary Figure 6h  
Data for Supplementary Figure 6i

Data for Supplementary Figure 7a  
Data for Supplementary Figure 7b  
Data for Supplementary Figure 8a  
Data for Supplementary Figure 8b  
Data for Supplementary Figure 9c  
Data for FACS gating  
Data related to Figure 5
